# Supplementary material for: Thalamocortical control of propofol phase-amplitude coupling
Source: PubMed Central journal article supplement (PMC5739502; doi:10.1371/journal.pcbi.1005879), 2017-12-11
Supplement: pcbi.1005879.s001.pdf [file pcbi.1005879.s001.pdf]

# Supplemental Appendix 1 for “Thalamocortical control of propofol phase-amplitude coupling”: Equations

Austin Soplata

May 19, 2017

## 1 General Notes

Units of maximal conductances and currents for all those below are in  $\frac{mS}{cm^2}$  and  $\frac{\mu A}{cm^2}$ , respectively, and are from [Hodgkin and Huxley, 1952], [Destexhe et al., 1993], and [Destexhe et al., 1996] by way of [Ching et al., 2010] unless otherwise indicated. All simulations were done with 50 TC and 50 RE cells, and for at least 6 seconds, solved using Euler integration, with a time resolution (dt) of 0.01 ms.

## 2 Intrinsic TC Cell Equations

### 2.1 Voltage / Membrane Potential

$$\dot{V}_{TC} = I_{applied} - I_{Na} - I_K - I_T - I_H - I_{Leak} - I_{KLeak} - I_{syn(\rightarrow TC)}$$

$I_{applied}$  was used to model background excitation (aka “applied current”), and was therefore variable, depending on the simulation. The bounds we investigated were roughly -2 to 2  $\frac{\mu A}{cm^2}$ .  $I_{applied}$  was always applied identically to TC and RE cells.

### 2.2 Sodium Channel Current

$$I_{Na} = \bar{g}_{Na} m^3 h (V_T - E_{Na})$$

Parameters:

$$V_T = V + 35mV$$

$$\bar{g}_{Na} = 90 \frac{mS}{cm^2}$$

$$E_{Na} = 50mV$$

State Variable Equations: m, h

$$\dot{m} = \alpha_m \cdot (1 - m) - \beta_m \cdot m \quad \dot{h} = \alpha_h \cdot (1 - h) - \beta_h \cdot h$$

$$\alpha_m = \frac{0.32 \cdot (13 - V_T)}{\exp(\frac{13 - V_T}{4}) - 1}$$

$$\alpha_h = 0.128 \cdot \exp(\frac{17 - V_T}{18})$$

$$\beta_m = \frac{0.28 \cdot (V_T - 40)}{\exp(\frac{V_T - 40}{5}) - 1}$$

$$\beta_h = \frac{4}{1 + \exp(\frac{40 - V_T}{5})}$$

### 2.3 Potassium Channel Current

$$I_K = \bar{g}_K n^4 (V_T - E_K)$$

Parameters:

$$V_T = V + 25mV$$

$$\bar{g}_K = 10 \frac{mS}{cm^2}$$

$$E_K = -100mV$$

State Variable Equations: n

$$\dot{n} = \alpha_n \cdot (1 - n) - \beta_n \cdot n$$

$$\alpha_n = \frac{0.032(15 - V_T)}{\exp(\frac{15 - V_T}{5}) - 1}$$

$$\beta_n = 0.5 \exp(\frac{10 - V_T}{40})$$

### 2.4 T-type Calcium Current (T-current)

$$I_T = \bar{g}_T m_\infty^2 h (V_T - E_T)$$

Parameters:

$$V_T = V + 2mV$$

$$\bar{g}_T = 2 \frac{mS}{cm^2}$$

$$E_T = 1000 \frac{8.31441 * 309.15}{2 * 96486} \ln \frac{2}{[Ca]_i}$$

State Variable Equations: m

$$m_\infty = \frac{1}{1 + \exp(\frac{-1}{6.2} \frac{V_T + 57}{6.2})}$$

State Variable Equations: h

$$\dot{h} = \frac{h_\infty - h}{\tau_h}$$

$$h_\infty = \frac{1}{1 + \exp(\frac{V_T + 81}{4})}$$

$$\tau_h = \left( 30.8 + \frac{211.4 + \exp(\frac{V_T + 113.2}{5})}{1 + \exp(\frac{V_T + 84}{3.2})} \right) / 3.73$$

State Variable Equations:  $[Ca]_i$

$$[\dot{Ca}]_i = \max\left(\frac{-10 \cdot I_T}{2 \cdot 96489}, 0\right) + \frac{0.00024 - [Ca]_i}{5}$$

### 2.5 Hyperpolarization-activated Current (H-current)

$$I_H = \bar{g}_H (o_1 + 2(1 - c_1 - o_1))(V - E_H)$$

Note: This is the more complex [Destexhe et al., 1996] formulation of the H-current, NOT that of [Destexhe et al., 1993].

Parameters:

$$\bar{g}_H = 0.025 \frac{mS}{cm^2} \text{ (but it depends... ask me)}$$

$$E_H = -43mV$$

Like  $I_{applied}$ ,  $\bar{g}_H$  changes depending on the simulation under investigation. See Results for more detail.

State Variable Equations:  $o_1, p_0, c_1$

$$\dot{o}_1 = k_4(1 - c_1 - o_1) - (k_{3,p_0} \cdot o_1)$$

$$\dot{p}_0 = k_2(1 - p_0) - (k_{1,Ca} \cdot p_0)$$

$$\dot{c}_1 = \beta \cdot o_1 - \alpha \cdot c_1$$

$$k_{1,Ca} = k_2 \cdot \left( \frac{[Ca]_i}{[Ca]_{crit}} \right)^4$$

-  $[Ca]_i$  is a state variable determined by the T-current.

$$k_2 = 0.0004$$

$$k_{3,p_0} = k_4 \cdot \left( \frac{1-p_0}{0.01} \right)^1$$

$$k_4 = 0.001$$

$$[Ca]_{crit} = 0.002 \text{ (mM of Calcium)}$$

$$\alpha = \frac{h_\infty}{\tau_s}$$

$$\beta = \frac{1-h_\infty}{\tau_s}$$

$$h_\infty = \frac{1}{1+\exp(\frac{V+75}{5.5})}$$

$$\tau_s = \left( 20 + 1000 / \left( \exp(\frac{V+71.5}{14.2}) + \exp(\frac{-(V+89)}{11.6}) \right) \right) / 1$$

## 2.6 Leak Currents

$$I_{Leak} = \bar{g}_{Leak}(V - E_{Leak})$$

Parameters:

$$\bar{g}_{Leak} = 0.01 \frac{mS}{cm^2}$$

$$E_{Leak} = -70mV$$

$$I_{KLeak} = \bar{g}_{KLeak}(V - E_{KLeak})$$

Parameters:

$$\bar{g}_{KLeak} = 0.0172 \frac{mS}{cm^2}$$

$$E_{KLeak} = -100mV$$

## 3 Intrinsic RE Cell Equations

### 3.1 Voltage / Membrane Potential

$$\dot{V}_{RE} = I_{applied} - I_{Na} - I_K - I_T - I_{Leak} - I_{KLeak} - I_{syn(\rightarrow RE)}$$

$I_{applied}$  was used to model background excitation (aka ‘‘applied current’’), and therefore was variable, depending on the simulation. The bounds we investigated were roughly -2 to  $2 \frac{\mu A}{cm^2}$ .  $I_{applied}$  was always applied identically to TC and RE cells.

### 3.2 Sodium Current

$$I_{Na} = \bar{g}_{Na} m^3 h (V_T - E_{Na})$$

Parameters:

$$V_T = V + 55mV$$

$$\bar{g}_{Na} = 200 \frac{mS}{cm^2}$$

$$E_{Na} = 50mV$$

State Variable Equations: m, h

$$\dot{m} = \alpha_m \cdot (1 - m) - \beta_m \cdot m \quad \dot{h} = \alpha_h \cdot (1 - h) - \beta_h \cdot h$$

$$\alpha_m = \frac{0.32 \cdot (13 - V_T)}{\exp(\frac{13 - V_T}{4}) - 1}$$

$$\alpha_h = 0.128 \cdot \exp(\frac{17 - V_T}{18})$$

$$\beta_m = \frac{0.28 \cdot (V_T - 40)}{\exp(\frac{V_T - 40}{5}) - 1}$$

$$\beta_h = \frac{4}{1 + \exp(\frac{40 - V_T}{5})}$$

### 3.3 Potassium Current

$$I_K = \bar{g}_K n^4 (V_T - E_K)$$

Parameters:

$$V_T = V + 55mV$$

$$\bar{g}_K = 20 \frac{mS}{cm^2}$$

$$E_K = -100mV$$

State Variable Equations: n

$$\dot{n} = \alpha_n \cdot (1 - n) - \beta_n \cdot n$$

$$\alpha_n = \frac{0.032(15 - V_T)}{\exp(\frac{15 - V_T}{5}) - 1}$$

$$\beta_n = 0.5 \exp(\frac{10 - V_T}{40})$$

### 3.4 T-type Calcium Current (T-current)

$$I_T = \bar{g}_T m^2 h (V_T - E_T)$$

Parameters:

$$V_T = V + 4mV$$

$$\bar{g}_T = 3 \frac{mS}{cm^2}$$

$$E_T = 120mV$$

State Variable Equations: m

$$\dot{m} = \frac{m_\infty - m}{\tau_m}$$

$$m_\infty = \frac{1}{1 + \exp(\frac{-(V_T + 50)}{7.4})}$$

$$\tau_m = \left( 3 + \frac{1}{\exp(\frac{V_T + 25}{10}) + \exp(\frac{-(V_T + 100)}{15})} \right) / \phi_m$$

$$\phi_m = 6.81$$

State Variable Equations:  $h$

$$\dot{h} = \frac{h_\infty - h}{\tau_h}$$

$$h_\infty = \frac{1}{1 + \exp(\frac{V_T + 78}{5})}$$

$$\tau_h = \left( 85 + \frac{1}{\exp(\frac{V_T + 46}{4}) + \exp(\frac{-(V_T + 405)}{50})} \right) / \phi_h$$

$$\phi_h = 3.73$$

State Variable Equations:  $[Ca]_i$

$$[Ca]_i = \max\left(\frac{-10 \cdot I_T}{2.96489}, 0\right) + \frac{0.00024 - [Ca]_i}{5}$$

### 3.5 Leak Currents

$$I_{Leak} = \bar{g}_{Leak}(V - E_{Leak})$$

Parameters:

$$\bar{g}_{Leak} = 0.05 \frac{mS}{cm^2}$$

$$E_{Leak} = -90mV$$

## 4 Synaptic Equations

### 4.1 Summary Equations and Connectivity

$$-I_{syn(\rightarrow TC)} = -I_{GABA_A(RE \rightarrow TC)}$$

$$-I_{GABA_B(RE \rightarrow TC)} - I_{Poisson(CT \rightarrow TC)}$$

$$-I_{syn(\rightarrow RE)} = -I_{AMPA(TC \rightarrow RE)}$$

$$-I_{GABA_A(RE \rightarrow RE)} - I_{Poisson(CT \rightarrow RE)}$$

$TC \rightarrow RE$ ,  $RE \rightarrow TC$ , and  $RE \rightarrow RE$  connections were all-to-all.  $CT \rightarrow TC$  and  $CT \rightarrow RE$  connections were all-to-all, but with a 50% connection probability. Note that there are not true cortical (CT) cells we are explicitly modeling, but rather we are only modeling artificial spiketrains going to the truly Hodgkin-Huxley modeled TC and RE cells.

### 4.2 AMPA Current

$$I_{AMPA} = \frac{\bar{g}_{AMPA}}{N_{pre}} s_{AMPA} (V_{post} - E_{AMPA})$$

Parameters:

$$\bar{g}_{AMPA(TC \rightarrow RE)} = 0.08 \frac{mS}{cm^2}$$

$$E_{AMPA} = 1mV$$

$$N_{pre} = \text{number of presynaptic cells}$$

Note that the canonical  $E_{AMPA}$  is usually 0 mV, however we used 1 mV due to a bug in the code at the time. This difference does not change our results.

State Variable Equations:  $s_{AMPA}$

$$\dot{s}_{AMPA} = 5(1 + \tanh(\frac{V_{pre}}{4}))(1 - s_{AMPA}) - \frac{s_{AMPA}}{\tau_{AMPA}}$$

$$\tau_{AMPA} = 2ms$$

### 4.3 $GABA_A$ Current

$$I_{GABA_A} = \frac{\bar{g}_{GABA_A}}{N_{pre}} s_{GABA_A} (V_{post} - E_{GABA_A})$$

Parameters:

$$\bar{g}_{GABA_A(RE \rightarrow TC)} = 0.069 \frac{mS}{cm^2}$$

$$\bar{g}_{GABA_A(RE \rightarrow RE)} = 0.069 \frac{mS}{cm^2}$$

$$E_{GABA_A} = -80mV$$

$$N_{pre} = \text{number of presynaptic cells}$$

State Variable Equations:  $s_{GABA_A}$

$$\dot{s}_{GABA_A} = 2(1 + \tanh(\frac{V_{pre}}{4}))(1 - s_{GABA_A}) - \frac{s_{GABA_A}}{\tau_{GABA_A}}$$

$$\tau_{GABA_A} = 5ms$$

Note that for ‘‘low-dose’’ propofol, we multiply  $\bar{g}_{GABA_A}$  and  $\tau_{GABA_A}$  by 2, and for ‘‘high-dose’’ propofol, we multiply  $\bar{g}_{GABA_A}$  and  $\tau_{GABA_A}$  by 3.

### 4.4 $GABA_B$ Current

$$I_{GABA_B} = \frac{\bar{g}_{GABA_B}}{N_{pre}} \frac{g^4}{g^4 + 100} (V_{post} - E_{GABA_B})$$

Note: the maximal synaptic conductance,  $\bar{g}_{GABA_B}$ , is different from the state variable of  $GABA_B$  named  $g$ . Apologies for the poor naming, but this naming is inherited and used for historical consistency.

Parameters:

$$\bar{g}_{GABA_B(RE \rightarrow TC)} = 0.001 \frac{mS}{cm^2}$$

$$E_{GABA_B} = -95mV$$

$$N_{pre} = \text{number of presynaptic cells}$$

State Variable Equations:  $r, g$

$$\dot{r} = k_1(2(1 + \tanh(\frac{V_{pre}}{4}))(1 - r) - k_2 \cdot r)$$

$$\dot{g} = k_3 \cdot r - k_4 \cdot g$$

$$k_1 = 0.5(mM^{-1}ms^{-1})$$

$$k_2 = 0.0012(ms^{-1})$$

$$k_3 = 0.18(ms^{-1})$$

$$k_4 = 0.034(ms^{-1})$$

This is, very slightly, an original formulation of the  $GABA_B$  current. The state variable  $r$  for  $GABA_B$  is ‘customized’ here, in that, rather than the popular formulation of a 0.5 mM box 0.3 ms long for the transmitter amount, inherited from [Destexhe et al., 1996], the VERY similar  $2(1 + \tanh(\frac{V_{pre}}{4}))$  method of calculating transmitter concentration from [Olufsen et al., 2003] is used. 0.3 ms is about as long as a neuron’s voltage

is above 0 mV, the latter being the definition of when this voltage-sensitive transmitter concentration is non-zero. The same concentration amplitude was used since I had already seen a long time of realistic results with  $GABA_A$  responding to it, and  $GABA_B$ 's effect obviously has a much more malleable effector in its maximal conductance. In many ways, this is a simplified version of the  $GABA_B$  current from [Vijayan and Kopell, 2012]: instead of a fixed spike of transmitter concentration when the presynaptic cell spikes, we use the same GABA concentration calculation method from the  $GABA_A$  current.

## 4.5 Artificial Poisson Cortical Spikes

These cortical spikes were made to simulate AMPAergic spikes to thalamic populations. They were adapted from the double-exponential synaptic model in Chapter 6 of [De Schutter, 2009]. Note that we are not explicitly modeling cortical cells, but instead creating our own spiketrains.

$$I_{Poisson} = \frac{\bar{g}_{Poisson}}{N_{pre}} G_e(t) (V_{post} - E_{AMPA})$$

Parameters:

$$\bar{g}_{Poisson}(CT \rightarrow TC) = 0.05 \frac{mS}{cm^2}$$

$$\bar{g}_{Poisson}(CT \rightarrow RE) = 0.05 \frac{mS}{cm^2}$$

$$E_{GABA_B} = 1mV$$

$N_{pre}$  = number of presynaptic cells (accounting for 50% connection probability)

Note: due to an error in normalization of the spike generation function, the **effective** synaptic strength of these spikes is tripled, meaning the final  $\bar{g}_{Poisson}$  that the thalamic cells ACTUALLY see are closer to  $0.15 \frac{mS}{cm^2}$ . All equations and parameters are shown AS RUN to maintain accuracy, but the normalization should be redone if one wants to use this Poisson AMPA functionality.

Functions:

$$G_e(t) = \text{spiketrain} \cdot \frac{10}{2-0.5} \left( \exp\left(\frac{-\max(t-1,0)}{2}\right) - \exp\left(\frac{-\max(t-1,0)}{0.5}\right) \right)$$

$G_e$  is the convolved spiketrain precalculated prior to running the simulation; the relevant data to the current step pulled from the vector and used in the current calculation at each step. The spiketrain is calculated by taking a matrix of uniformly distributed data, removing all values except for those as rare as how frequently a 12 Hz spike would happen in proportion to the entire time length. The final  $G_e$  will be a convolved spiketrain that is random between each "source cell" spiketrain.

## 5 Reproducibility and Code

All final simulations were run using the DynaSim software package [Sherfey, 2016]. The individual mechanism files for

use with DynaSim are available online [Soplata, 2017b], as is a companion download of DynaSim itself along with the mechanisms where the only thing you need is a copy of MATLAB, [Soplata, 2017a]

## References

- S. Ching, A. Cimenser, P. L. Purdon, E. N. Brown, and N. J. Kopell. Thalamocortical model for a propofol-induced alpha-rhythm associated with loss of consciousness. *Proceedings of the National Academy of Sciences*, 107(52):22665–22670, December 2010. ISSN 0027-8424, 1091-6490. doi: 10.1073/pnas.1017069108. URL <http://www.pnas.org/cgi/doi/10.1073/pnas.1017069108>.
- Erik De Schutter, editor. *Computational Modeling Methods for Neuroscientists*. The MIT Press, September 2009. ISBN 978-0-262-01327-7. URL <http://mitpress.universitypressscholarship.com/view/10.7> DOI: 10.7551/mitpress/9780262013277.001.0001.
- A Destexhe, A Babloyantz, and T J Sejnowski. Ionic mechanisms for intrinsic slow oscillations in thalamic relay neurons. *Biophysical Journal*, 65(4):1538–1552, October 1993. ISSN 0006-3495. URL <http://www.ncbi.nlm.nih.gov/pmc/articles/PMC1225880/>.
- Alain Destexhe, Thierry Bal, David A. McCormick, and Terrence J. Sejnowski. Ionic mechanisms underlying synchronized oscillations and propagating waves in a model of ferret thalamic slices. *Journal of Neurophysiology*, 76(3):2049–2070, 1996.
- Alan L. Hodgkin and Andrew F. Huxley. A quantitative description of membrane current and its application to conduction and excitation in nerve. *The Journal of physiology*, 117(4):500, 1952. URL <http://www.ncbi.nlm.nih.gov/pmc/articles/pmc1392413/>.
- Mette S. Olufsen, Miles A. Whittington, Marcelo Camperi, and Nancy Kopell. New roles for the gamma rhythm: population tuning and preprocessing for the beta rhythm. *Journal of Computational Neuroscience*, 14(1):33–54, 2003. URL <http://link.springer.com/article/10.1023/A:1021124317706>
- Jason Sherfey. DynaSim: a Matlab toolbox for rapidly building and exploring neural models. 2016.
- Austin Soplata. propofol-coupling-2017-full, 2017a. URL <https://github.com/asoplata/propofol-coupling-2017-full>.
- Austin Soplata. propofol-coupling-2017-mechanisms, 2017b. URL <https://github.com/asoplata/propofol-coupling-2017-mechanisms>.
- S. Vijayan and N. J. Kopell. Thalamic model of awake alpha oscillations and implications for stimulus processing. *Proceedings of the National Academy of Sciences*, 109(45):18553–18558, November 2012. ISSN 0027-8424, 1091-6490. doi: 10.1073/pnas.1215385109. URL <http://www.pnas.org/cgi/doi/10.1073/pnas.1215385109>.
